# Supplementary material for: CRISPR-Cas9 Mediated Mutation in OsPUB43 Improves Grain Length and Weight in Rice by Promoting Cell Proliferation in Spikelet Hull
Source: Int J Mol Sci. 2022 Feb 21;23(4):2347. doi: 10.3390/ijms23042347 (PMC8877319; doi:10.3390/ijms23042347)
Supplement: Supplementary file 1 [file ijms-23-02347-s001.zip › Supplementary Table S1.xlsx]

## Sheet: Sheet1
	Primers used for plasmid construction.
	Primer	Sequence (5′– 3′)	Enzyme	Vector
	OsPUB43-Pro-XhoI F	GGTACCGGGCCCCCCCTCGAGCATTCCCCGTAATTAATCGTGC	XhoI	pGreenII 0800
	OsPUB43-Pro-XhoI R	ATCGATACCGTCGACCTCGAGAAGGTGGAAGGCGATGGAGA	XhoI	pGreenII 0800
	OsBZR1-62-SK-EcoRI F	TCCCCCGGGCTGCAGGAATTCATGACGTCCGGGGCGGCG	EcoRI	pGreenII 62-SK
	OsBZR1-62-SK-EcoRI R	TCAGCGTACCGAATTGGTACCTCATTTCGCGCCGACGCC	EcoRI	pGreenII 62-SK
	U3-OsPUB43- F	GCCAATCGAGTCGTGGGTGGCCAC		CRISPR/Cas9
	U3-OsPUB43- R	AAACGTGGCCACCCACGACTCGAT		CRISPR/Cas9
	Primers used for qRT-PCR analysis
	Primer	Sequence (5′– 3′)
	Actin1-qRCR-F	CTACATACAACTCCATCATGAAGTGCG
	Actin1-qRCR-R	GGCAATCCACATCTGCTGGAATG
	OsPUB43-qRCR-F	CAACTCCGACGACTTCCTCCAAC
	OsPUB43-qRCR-R	TTCTCCGTCGTCGATGCTTGG
	OsMADS1-qPCR-F	TATTTTGCTAAGTACGTGCGTG
	OsMADS1-qPCR-R	ACTTGTTACCACATCCAAAACG
	OsMADS6-qPCR-F	GCATCGAGAACAAGATCAACAG
	OsMADS6-qPCR-R	CTAAAGTCTTTGTTATGCCGGC
	OsMADS29-qPCR-F	GATTCTGGGAGCTAGGAGTAAC
	OsMADS29-qPCR-R	GTTCAGTAGTTCACACACCAAC
	OsMADS34-qPCR-F	AGCTTCAGTTAATCAGGGTCAA
	OsMADS34-qPCR-R	TACCATATCACGCACCTTACTC
	OsBZR1-qPCR-F	CACCTACCGCAAGGGATGTAAGC
	OsBZR1-qPCR-R	CTCGGGAAGCTCGACGACG
	CycB1;1-qPCR-F	GATTGAGGACATTGACAAGCTC
	CycB1;1-qPCR-R	GCGACCTTGTAGAACTTGTAGA
	OsKRP1-qPCR-F	AAGTACAACTTCGACGTCGTTC
	OsKRP1-qPCR-R	TTCCTTTCTAGCTTCCGCTTAA
	DLT-qPCR-F	AGTCGGCGAGTCGAGGCAGGAGC
	DLT-qPCR-R	GTGCATGGCGAGGACGCAGTTCA
